# Supplementary material for: Diffusion Mediates Molecular Transport through the Perivascular Space in the Brain
Source: Int J Mol Sci. 2024 Feb 20;25(5):2480. doi: 10.3390/ijms25052480 (PMC10931628; doi:10.3390/ijms25052480)
Supplement: Supplementary file 1 [file ijms-25-02480-s001.zip]

Archive with 4 entries (4 files):
- Legends to Supplementary Movie.pdf
- Movie_S1_A_over20min.mp4
- Movie_S2_V_over10min.mp4
- Movie_S3_3D.mp4
